# Supplementary material for: Two microporous CoII-MOFs with dual active sites for highly selective adsorption of CO2/CH4 and CO2/N2
Source: Royal Society of Chemistry journal article supplement (doi:10.1039/c9dt02694k), 2019-01-01
Supplement: c9dt02694k1.pdf [file c9dt02694k1.pdf]

**Electronic Supporting Information (ESI)**  
**for**

**Two microporous Co<sup>II</sup>-MOFs with dual active sites for highly selective  
adsorption of CO<sub>2</sub>/CH<sub>4</sub> and CO<sub>2</sub>/N<sub>2</sub>**

Hui-Yan Ma,<sup>a</sup> Yong-Zheng Zhang,<sup>b</sup> Hui Yan,<sup>a</sup> Wen-Jie Zhang,<sup>a</sup> Yun-Wu Li,<sup>a,\*</sup> Su-Na Wang,<sup>a,\*</sup>

Da-Cheng Li,<sup>a</sup> Jian-Min Dou<sup>a</sup> and Jian-Rong Li<sup>b</sup>

---

<sup>a</sup> *School of Materials Science and Engineering, Shandong Provincial Key Laboratory / Collaborative Innovation Center of Chemical Energy Storage and Novel Cell Technology, and School of Chemistry and Chemical Engineering, Liaocheng University, Liaocheng 252000, P. R. China.*

*E-mail: [liyunwu@lcu.edu.cn](mailto:liyunwu@lcu.edu.cn) (Y. W. Li); [wangsuna@lcu.edu.cn](mailto:wangsuna@lcu.edu.cn) (S. N. Wang).*

<sup>b</sup> *Beijing Key Laboratory for Green Catalysis and Separation, Department of Chemistry and Chemical Engineering, College of Environmental and Energy Engineering, Beijing University of Technology, Beijing 100124, P. R. China.*

---

## S1. Experimental Section

### Materials and methods.

All chemicals were commercially purchased and used as received.

Elemental analyses (C, H and N) were performed on a Perkin-Elmer 2400 II analyzer (Perkin-Elmer, USA). The powder X-ray diffraction (PXRD) was obtained on a D/MAX-rA (Rigaku) diffractometer with Cu K $\alpha$  radiation ( $\lambda = 1.542 \text{ \AA}$ ) with a scan rate of  $4^\circ \text{ min}^{-1}$ . The tube voltage and current are 36 kV and 20 mA, respectively. FT-IR spectra were recorded on a FT6700 spectrometer (USA) using KBr disc method in the range of  $400\text{--}4000 \text{ cm}^{-1}$ . Simulation of the PXRD spectra were carried out by the single-crystal data and diffraction-crystal module of the Mercury (Hg) program available free of charge *via* the Internet at <http://www.iucr.org>.

### Syntheses of LCU-105 and LCU-106:

#### $\{[\text{H}_2\text{N}(\text{CH}_3)_2]_2[\text{Co}(\text{BPTC})]\cdot 4\text{DMAC}\cdot 5\text{H}_2\text{O}\}_n$ (LCU-105):

A mixture of  $\text{Co}(\text{NO}_3)_3\cdot 6\text{H}_2\text{O}$  (87.31 mg, 0.3 mmol) and  $\text{H}_4\text{BPTC}$  (99 mg, 0.3 mmol) in DMAC (6 mL) was sealed in a Teflon-lined stainless steel vessel (23 mL), which was heated at  $120^\circ \text{C}$  for 4 days and then cooled to room temperature at a rate of  $10^\circ \text{C}\cdot\text{h}^{-1}$ . Block-like purple crystals of **LCU-105** were collected. Yield: 30% based on Co. Elemental analysis (%) for activated sample **LCU-105a**,  $\text{C}_{20}\text{H}_{22}\text{O}_8\text{N}_2\text{Co}$  ( $M = 477.33$ ): *Calcd.*: C, 50.32; H, 4.65; N, 5.87; *Found*: C, 50.41; H, 4.56; N, 5.81; IR (KBr disk,  $\text{cm}^{-1}$ ) see **Fig. S6** in ESI.

#### $\{[\text{H}_2\text{N}(\text{CH}_3)_2]_2[\text{Co}_{0.5}\text{Na}(\text{BPTC})]\cdot \text{DMF}\}_n$ (LCU-106):

A mixture of  $\text{Co}(\text{NO}_3)_3\cdot 6\text{H}_2\text{O}$  (87.31 mg, 0.3 mmol),  $\text{H}_4\text{BPTC}$  (99 mg, 0.3 mmol) and NaOH (20 mg, 0.5 mmol) in DMF (6 mL) was sealed in a Teflon-lined stainless steel vessel (23 mL), which was heated at  $120^\circ \text{C}$  for 4 days and then cooled to room temperature at a rate of  $10^\circ \text{C}\cdot\text{h}^{-1}$ . Block-like purple crystals of **LCU-106** were collected. Yield: 26% based on Co. Elemental analysis (%) for activated sample **LCU-106a**,  $\text{C}_{40}\text{H}_{44}\text{O}_{16}\text{N}_4\text{Na}_2\text{Co}$  ( $M = 941.71$ ): *Calcd.*: C, 51.02; H, 4.71; N, 5.95; *Found*: C, 51.13; H, 4.66; N, 5.87. IR (KBr disk,  $\text{cm}^{-1}$ ) see **Fig. S7** in ESI.

---

## X-ray Crystallography.

The crystallographic data of **LCU-105** and **LCU-106** were collected on a Rigaku SCX-mini diffractometer and Bruker SMART at 100(2) K with Mo-K $\alpha$  radiation ( $\lambda = 0.71073$  Å), respectively. The crystal data were solved by direct methods and refined by a full-matrix least-square method on  $F^2$  using the *SHELXL-97* crystallographic software package.<sup>S1</sup> Co and Na atoms in **LCU-105** and **LCU-106** were found from *E*-maps and other non-hydrogen atoms were located in successive difference Fourier syntheses. The final refinement was performed by full matrix least-squares methods with anisotropic thermal parameters for non-hydrogen atoms on  $F^2$ . The hydrogen atoms of organic ligands were added theoretically, riding on the concerned atoms and refined with fixed thermal factors. During the refinement of the two compounds, the command “omit -3 50” was used to omit some disagreeable reflections. The command “dfix” was used to fix bonds of solvent and [NH<sub>2</sub>(CH<sub>3</sub>)<sub>2</sub>]<sup>+</sup> cations. For **LCU-105**, the commands “sadi” and “flat” were used to solve the alert of “Large Hirshfeld Difference...”. The atoms C17, C18, C19, C20, C22, C24, N1, N2, N3 and O2w were restrained using thermal restraints (isor and simu) to solve ADP or NDP alerts and make the displacement parameters more reasonable. In order to subtract the contribution from the disordered solvent molecules, the SQUEEZE command was applied, which gave a new HKL file. The number of located electrons, 174 in two voids per unit cell, is included in the formula, formula weight, calculated density, and F(000). These residual electron density were assigned to three DMAC and three water for **LCU-105**. So SQUEEZE removed three DMAC and three water per unit cell. And the tentative formula for this compound is presented as in the text. For **LCU-106**, the commands “sadi” and “flat” were used to solve the alert of “Large Hirshfeld Difference...”. The atoms N3, O9, C20, C22 and C23 were restrained using thermal restraints (isor and simu) to solve ADP or NDP alerts and make the displacement parameters more reasonable. The H atoms of the coordinated water molecules in **LCU-105** cannot be added in the calculated positions, and they were directly included in the final molecular formula. Due to the limited crystal quality, the more solvents, and the relatively high “restraints” in the both compounds, which all result the higher *R* value. Further details of crystal data and structure refinement for **LCU-105** and **LCU-106** were summarized as follows in Table S1. Selected bond lengths of them were given in Table S2 and Table S3. Full crystallographic data for **LCU-105** and **LCU-106** have been deposited with the CCDC (1918594 for **LCU-105**, and 1918595 for **LCU-106**). These data can be obtained free of charge from The Cambridge Crystallographic Data Centre via [www.ccdc.cam.ac.uk/data\\_request/cif](http://www.ccdc.cam.ac.uk/data_request/cif).<sup>S3</sup>

---

## References

- S1 (a) G. M. Sheldrick, *SHELXL97, Program for Crystal Structure Refinement*; University of Göttingen: Göttingen, Germany, 1997; (b) G. M. Sheldrick, *SHELXS97, Program for Crystal Structure Solution*; University of Göttingen: Göttingen, Germany, 1997.
- S2 A. L. Spek, PLATON, A Multipurpose Crystallographic Tool, Utrecht University, 2003.
- S3 The checkcif program available at: <http://journals.iucr.org/services/cif/checkcif.html>.

## Crystal data for LCU-105 and LCU-106

**Table S1. Crystal Data and Structure Refinement Parameters for Compounds LCU-105 and LCU-106.**

| Compounds                         | LCU-105                                                           | LCU-106                                                                           |
|-----------------------------------|-------------------------------------------------------------------|-----------------------------------------------------------------------------------|
| Formula                           | C <sub>36</sub> H <sub>68</sub> O <sub>17</sub> N <sub>6</sub> Co | C <sub>48</sub> H <sub>62</sub> O <sub>18</sub> N <sub>8</sub> Na <sub>2</sub> Co |
| $F_w$                             | 915.89                                                            | 1143.96                                                                           |
| $\lambda/\text{\AA}$              | 0.71073                                                           | 0.71073                                                                           |
| $T/\text{K}$                      | 100(2)                                                            | 100(2)                                                                            |
| Crystal system                    | Monoclinic                                                        | Monoclinic                                                                        |
| Space group                       | $P2/c$                                                            | $C2/c$                                                                            |
| $a [\text{\AA}]$                  | 19.601(4)                                                         | 17.6254(16)                                                                       |
| $b [\text{\AA}]$                  | 9.3797(19)                                                        | 19.9755(15)                                                                       |
| $c [\text{\AA}]$                  | 18.630(4)                                                         | 15.3066(11)                                                                       |
| $\alpha [^\circ]$                 | 90                                                                | 90                                                                                |
| $\beta [^\circ]$                  | 95.69(3)                                                          | 104.504(8)                                                                        |
| $\gamma [^\circ]$                 | 90                                                                | 90                                                                                |
| $V (\text{\AA}^3)$                | 3408.3(12)                                                        | 5217.3(7)                                                                         |
| $Z$                               | 4                                                                 | 4                                                                                 |
| $D_c/\text{Mg}\cdot\text{m}^{-3}$ | 1.113                                                             | 1.520                                                                             |
| $F(000)$                          | 1144                                                              | 2492                                                                              |
| Reflections collected/unique      | 26897/5995                                                        | 16997/5028                                                                        |
| $R_{\text{int}}$                  | 0.2573                                                            | 0.0540                                                                            |
| Data/Restraints/Parameters        | 5995/116/352                                                      | 5028/93/332                                                                       |

---

|                                                                                                                    |                 |               |
|--------------------------------------------------------------------------------------------------------------------|-----------------|---------------|
| $R_1/wR_2 [I>2\sigma(I)]^a$                                                                                        | 0.0.1492/0.3669 | 0.1128/0.3335 |
| $R_1/wR_2 [(\text{all data})]^a$                                                                                   | 0.2352/0.4167   | 0.1261/0.3526 |
| GOF on $F^2$                                                                                                       | 1.130           | 1.105         |
| $^a R_I = \Sigma( F_0  -  F_C )/\Sigma F_0  \quad wR_2 = [\Sigma w( F_0 ^2 -  F_C ^2)/(\Sigma w F_0 ^2)^2]^{1/2}.$ |                 |               |

---

### Sorption measurements.

Gas adsorption/desorption measurements were carried out using a Micrometrics ASAP 2020M volumetric gas adsorption instrument. UHP-grade gases were used in measurements. Before the measurement, the samples of **LCU-105** and **LCU-106** were soaked in anhydrous methanol ( $\text{CH}_3\text{OH}$ ) for 3 days to remove DMAC and DMF solvent molecules in the channels, and then filtrated, and activation of the methanol-exchanged **LCU-105** and **LCU-106** at 120 °C under high vacuum (less than  $10^{-5}$  Torr) overnight led to the formation of activated sample **LCU-105a** and **LCU-106a**. About 110 mg (for **LCU-105**) and 100 mg (for **LCU-106**) of the desolvated samples were used for the entire adsorption/desorption measurements. The Ar adsorption/desorption isotherm measurements were proceeded at 77 K in a liquid nitrogen bath. The  $\text{CO}_2$ ,  $\text{CH}_4$  and  $\text{N}_2$  adsorption/desorption isotherm measurements were carried out at 273 K in an ice-water bath, respectively.

## S2. Figures in Supporting Information

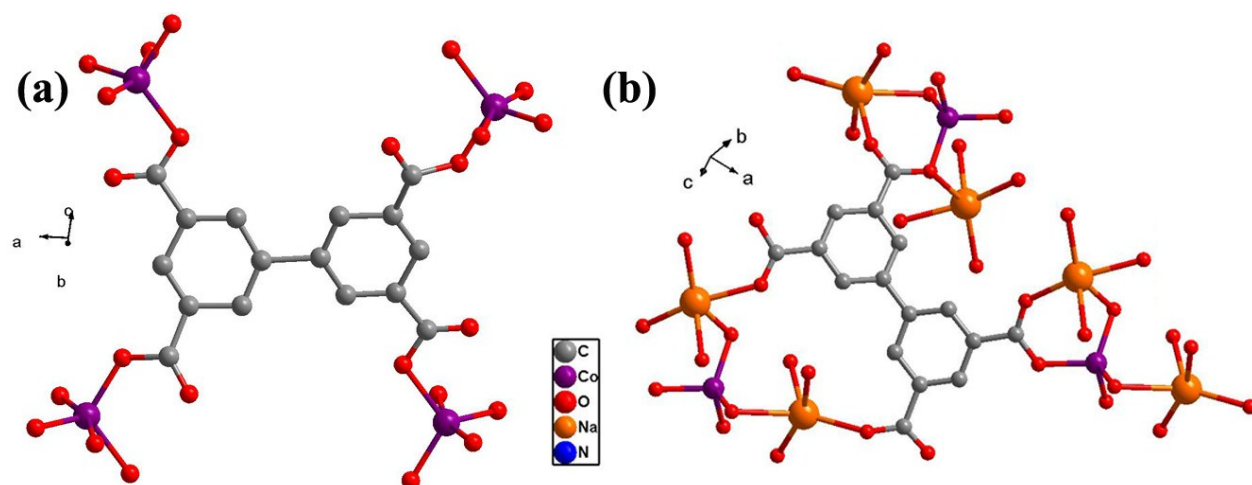

**Fig. S1** The coordination mode of the ligands in (a) LCU-105 and (b) LCU-106.

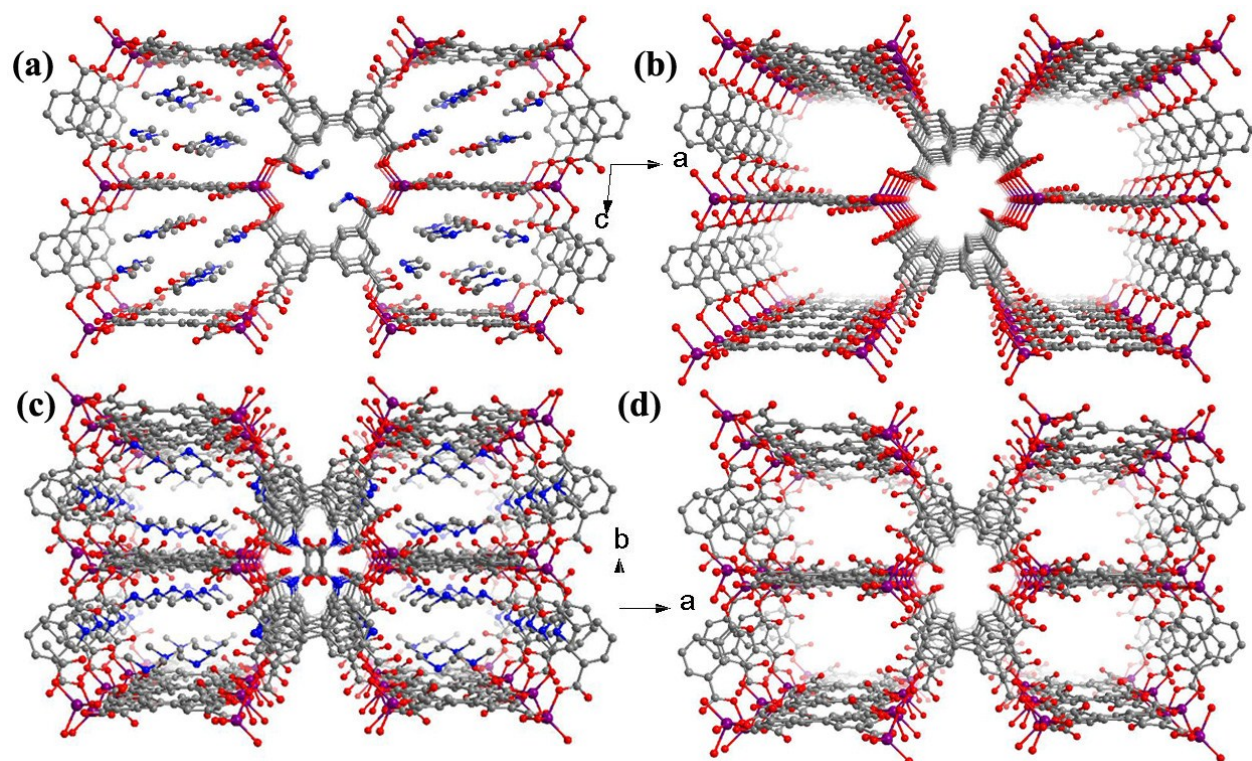

**Fig. S2** The 3D structure of LCU-105 in different directions.

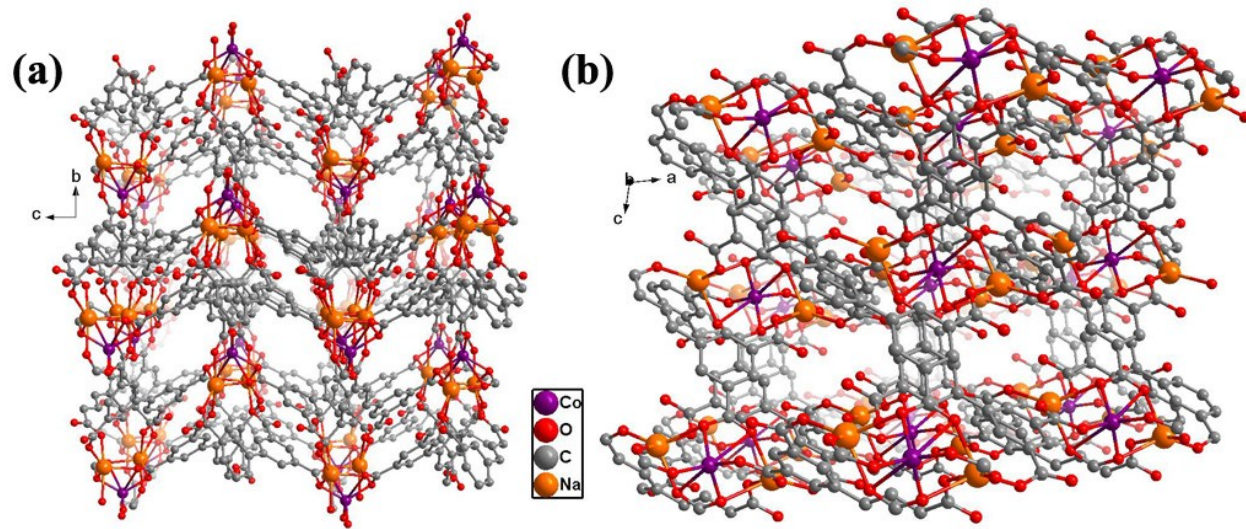

**Fig. S3** The 3D structure of **LCU-106** in different directions.

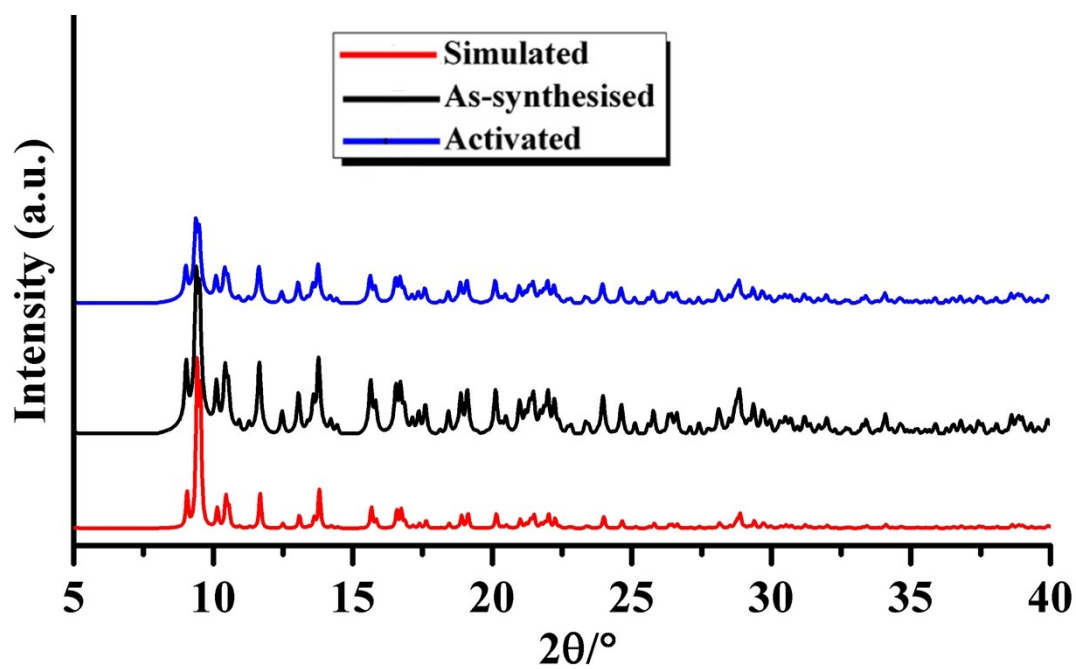

Fig. S4 PXRD patterns of LCU-105 and LCU-105a.

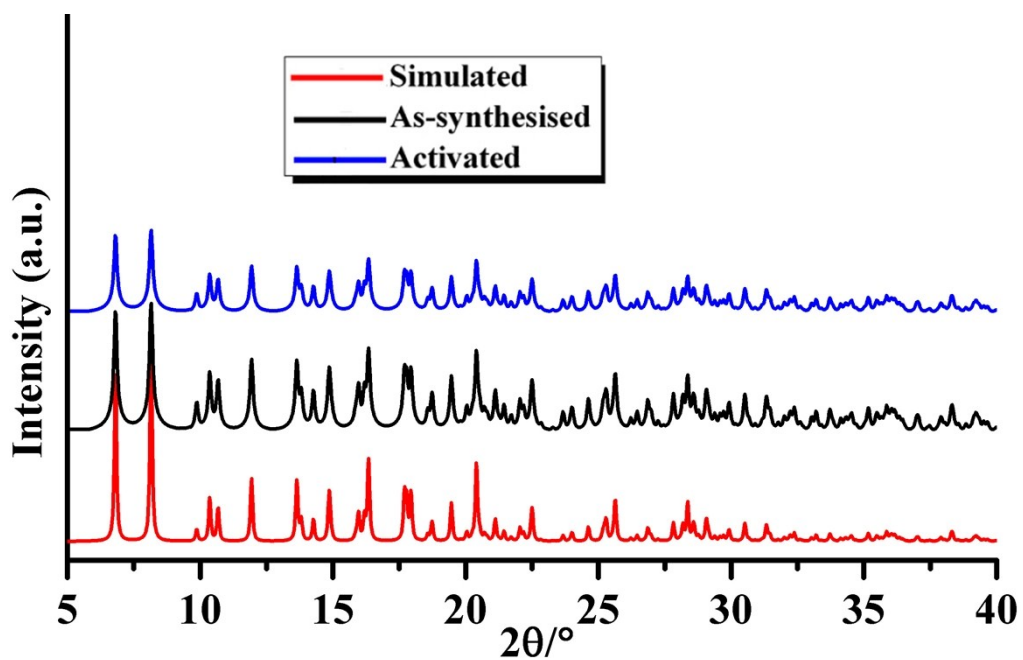

Fig. S5 PXRD patterns of LCU-106 and LCU-106a.

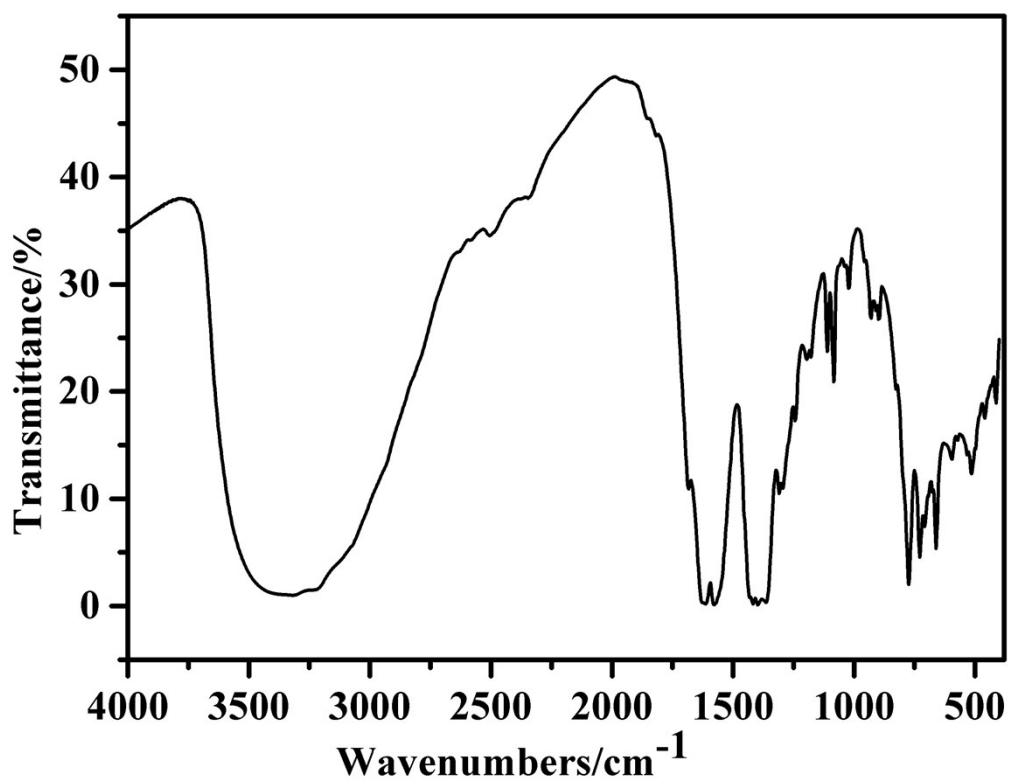

Fig. S6 IR spectra of compound LCU-105.

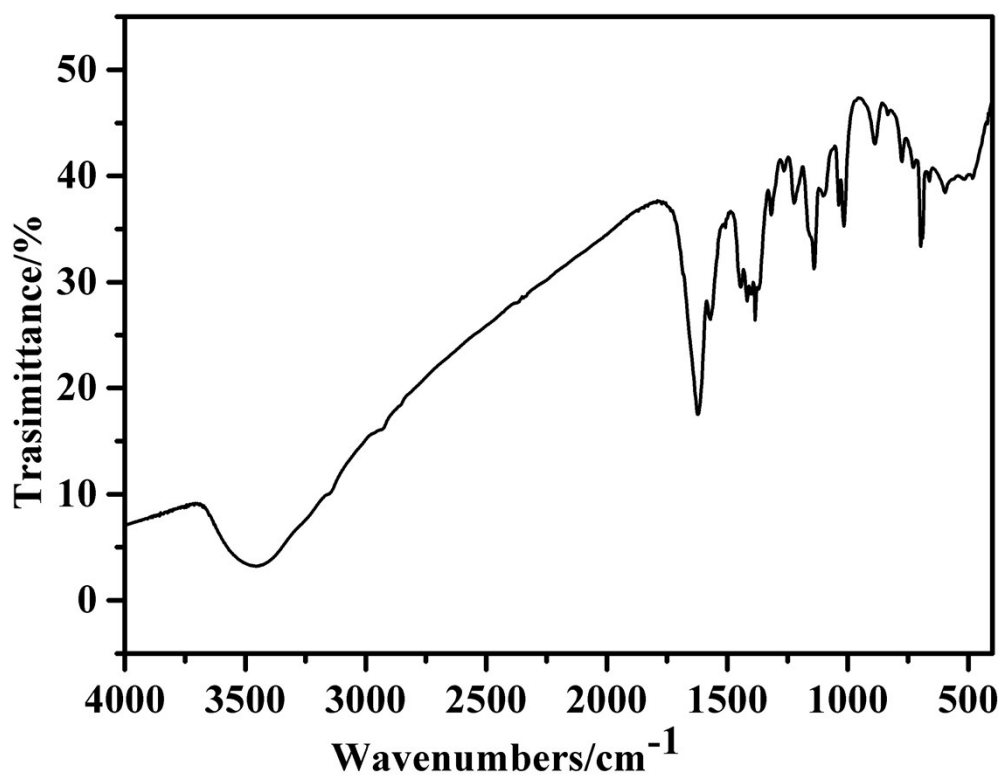

Fig. S7 IR spectra of compound LCU-106.

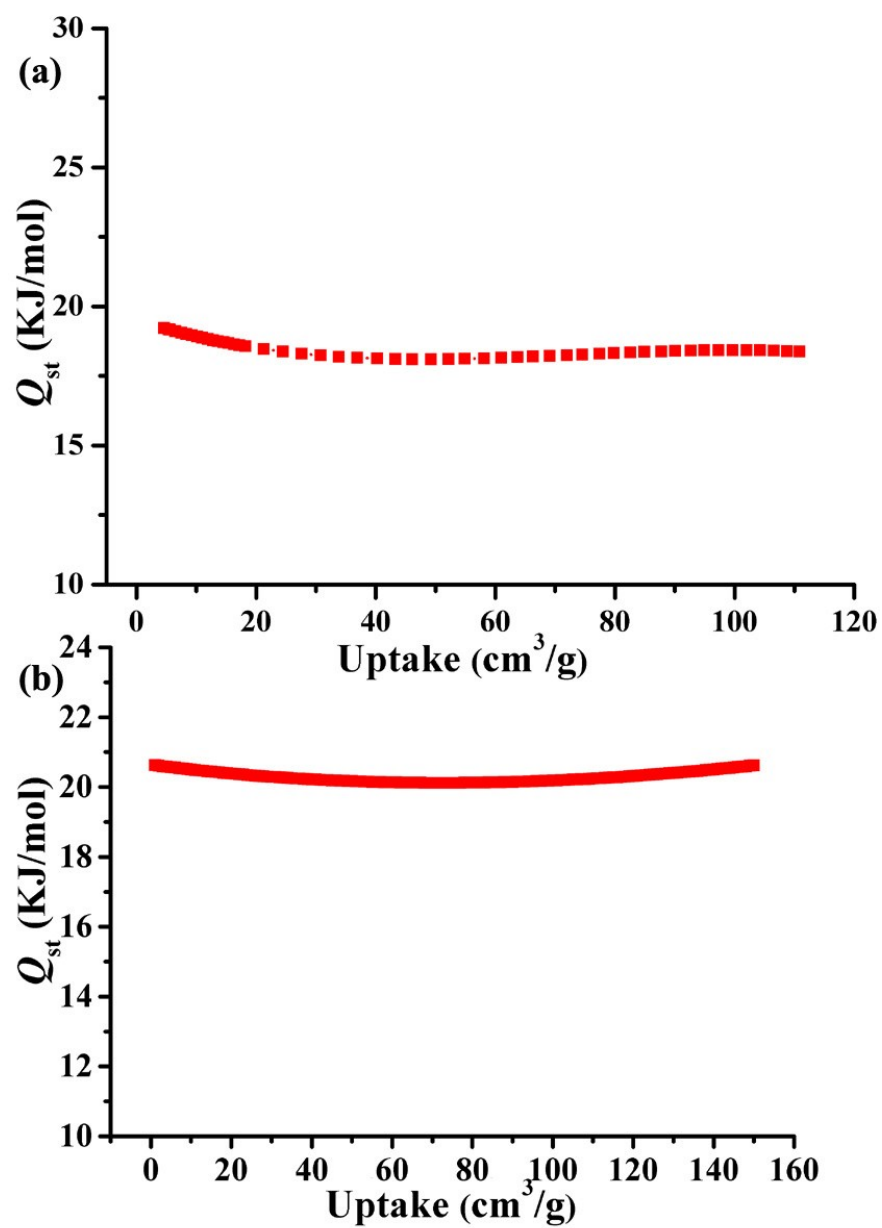

**Fig. S8** CO<sub>2</sub> adsorption enthalpy of LCU-105a and LCU-106a calculated from the CO<sub>2</sub> adsorption isotherms at 273 K and 298 K.

---

### S3. IAST adsorption selectivity calculation:<sup>S4-S5</sup>

IAST (ideal adsorption solution theory) was used to predict binary mixture adsorption from the experimental pure-gas isotherms. In order to perform the integrations required by IAST, the single component isotherms should be fitted by a proper model. In practice, several methods to do this are available. We found for this set of data that the dual-site Langmuir-Freundlich equation was successful in fitting the data.

$$q = \frac{q_{m,1}b_1P^{1/n_1}}{1+b_1P^{1/n_1}} + \frac{q_{m,2}b_2P^{1/n_2}}{1+b_2P^{1/n_2}}$$

Here,  $P$  is the pressure of the bulk gas at equilibrium with the adsorbed phase (kPa),  $q$  is the adsorbed amount per mass of adsorbent (mmol/g),  $q_{m,1}$  and  $q_{m,2}$  are the saturation capacities of sites 1 and 2 (mmol/g),  $b_1$  and  $b_2$  are the affinity coefficients of sites 1 and 2 (1/kPa), and  $n_1$  and  $n_2$  represent the deviations from an ideal homogeneous surface. The fitted parameters were then used to predict multicomponent adsorption with IAST.

The selectivity  $SA/B$  in a binary mixture of components  $A$  and  $B$  is defined as  $(x_A/y_A) / (x_B/y_B)$ , where  $x_i$  and  $y_i$  are the mole fractions of component  $i$  ( $i = A, B$ ) in the adsorbed and bulk phases, respectively.

S4 F. Daniels, R. A. Alberty, J. W. Williams, C. D. Cornwell, P. Bender and J. E. Harriman,

*Experimental Physical Chemistry, 6th Ed, McGraw-Hill Book Co. Inc., New York, 1962.*

S5 M. Dincă and J. R. Long, *J. Am. Chem. Soc.*, 2005, **127**, 9376–9377.

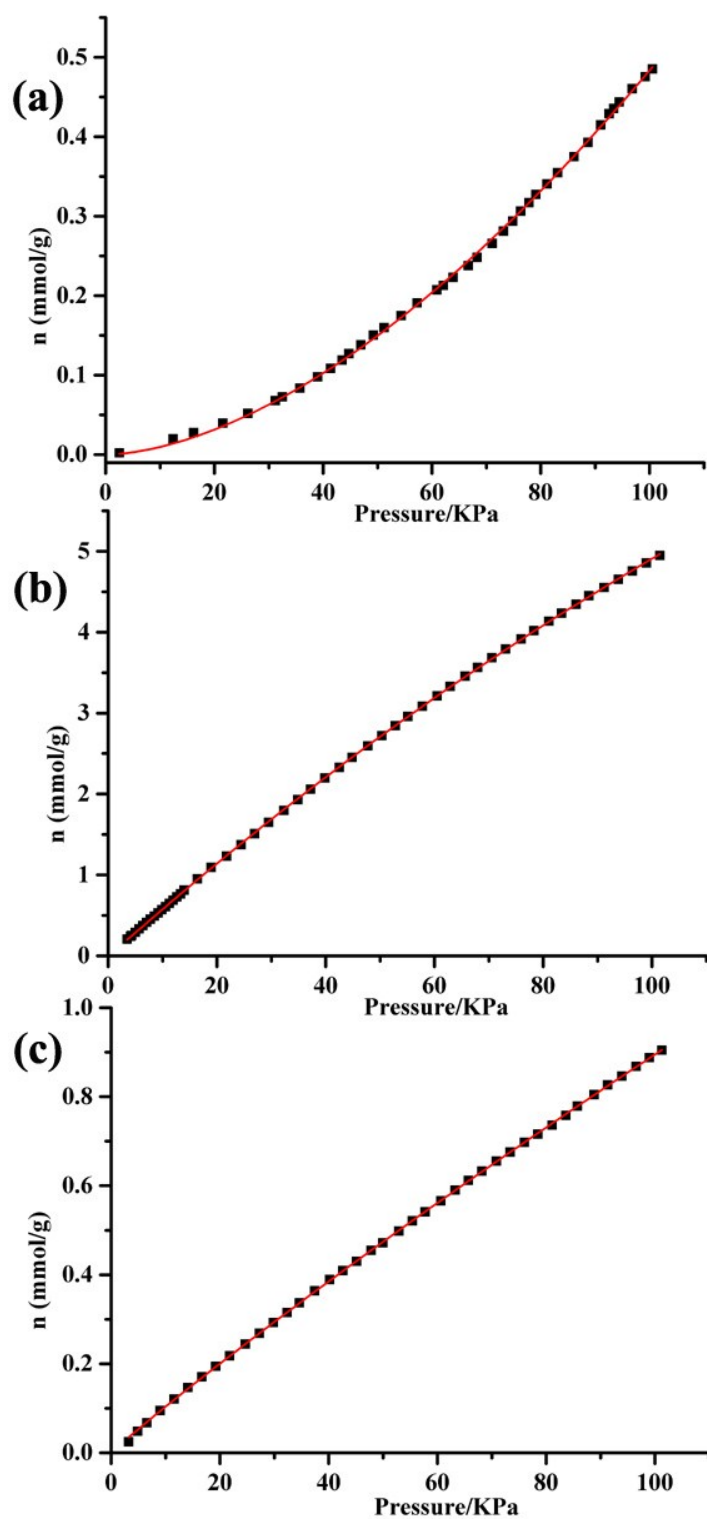

**Fig. S9**  $\text{N}_2$ ,  $\text{CO}_2$  and  $\text{CH}_4$  adsorption isotherms of LCU-105a with fitting by Langmuir-Freundlich Fit model at 273 K.

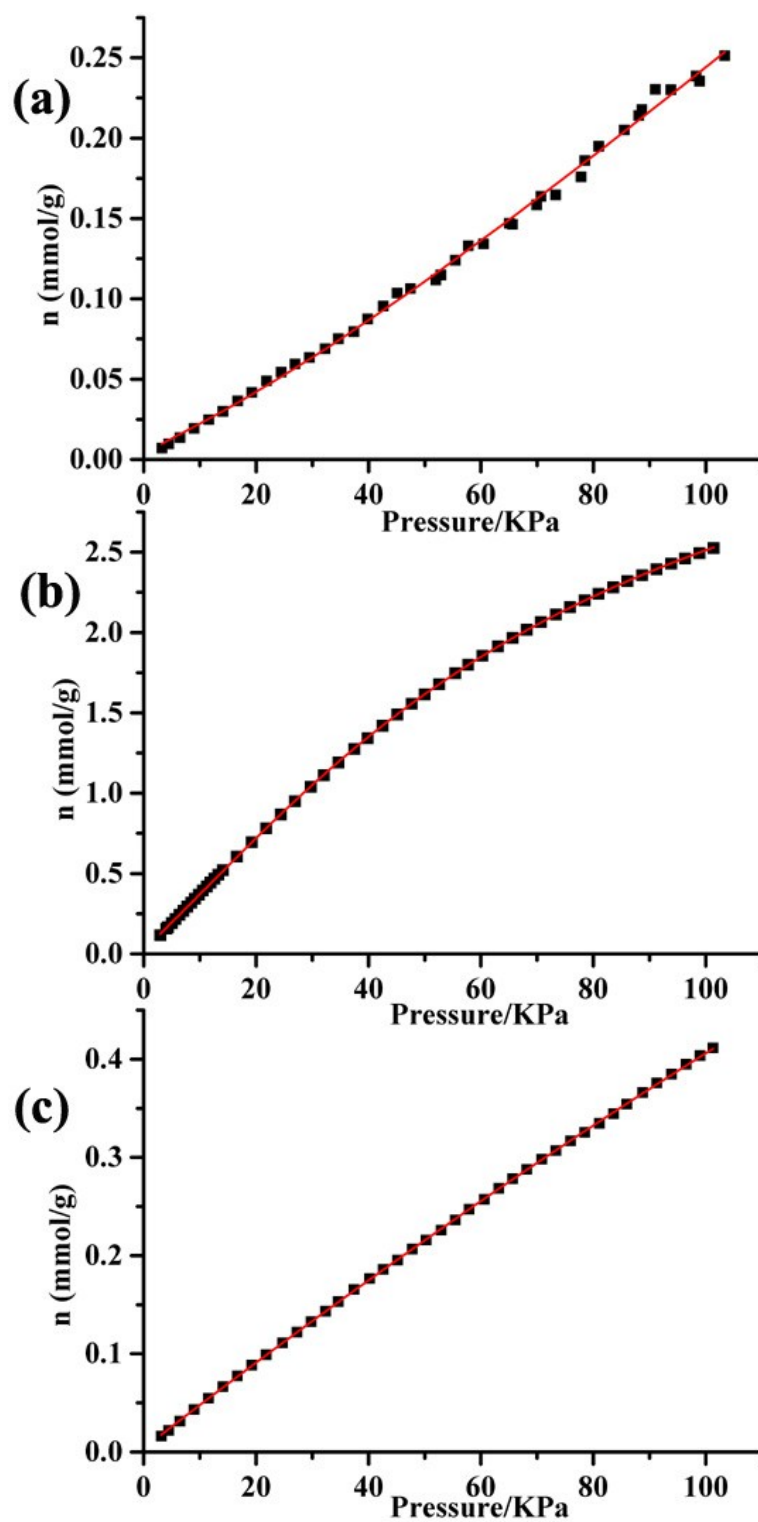

**Fig. S10**  $\text{N}_2$ ,  $\text{CO}_2$  and  $\text{CH}_4$  adsorption isotherms of LCU-106a with fitting by Langmuir-Freundlich Fit model at 273 K.

---

#### S4 The computational simulation studies of gases adsorption

To further investigate interactions between CO<sub>2</sub> molecules and the **LCU- 105** and **LCU-106**, grand canonical Monte Carlo (GCMC) simulations were carried out using the Sorption module of Materials Studio 5.0 package.<sup>S6</sup> The Locate and Metropolis methods<sup>S7</sup> were used to predict the possible binding sites of CO<sub>2</sub> molecules onto the frameworks. The unit cell frameworks of **LCU-105** and **LCU-106** were constructed from experimental crystal X-ray diffraction data. The loading number of CO<sub>2</sub> adsorbed onto each unit cell of the two kinds of frameworks was choose as 10 based on our experimental data. During the simulation, the CO<sub>2</sub> and dimethylamine molecules including the frameworks were considered as rigid, and periodic boundary conditions were applied in all three directions. The interaction energy between CO<sub>2</sub> and frameworks were calculated by the Coulomb and Lennard-Jones 6-12 (LJ) potentials. A cutoff radius of 12.5 Å for the LJ potentials was used throughout the simulation. All parameters including the partial charges were assigned by the COMPASS force field<sup>S8</sup> embedded in the Sorption module.

S6 Accelrys, *Materials Studio Getting Started, release 5.0*; Accelrys Software, Inc.: San Diego, CA, 2009.

S7 N. Metropolis and S. Ulam, *J. Am. Stat.l Assoc.*, 2012, **44**, 335–341.

S8 H. Sun, *J. Phys. Chem. B*, 1998, **102**, 7338–7364.

---

**S5. The selected bond lengths [Å] and angles [°] of compounds LCU-105 and LCU-106.****Table S2** The selected bond lengths [Å] and angles [°] of compound **LCU-105**.

|                                                                                                                               |          |                     |           |
|-------------------------------------------------------------------------------------------------------------------------------|----------|---------------------|-----------|
| O(7)-Co(2)#1                                                                                                                  | 1.923(8) | Co(2)-O(1)          | 1.909(10) |
| Co(2)-O(5)                                                                                                                    | 1.920(9) | Co(2)-O(7)#2        | 1.923(8)  |
| Co(2)-O(4)#3                                                                                                                  | 1.951(9) | O(4)-Co(2)#4        | 1.951(9)  |
| O(1)-Co(2)-O(5)                                                                                                               | 98.1(4)  | O(1)-Co(2)-O(7)#2   | 111.5(4)  |
| O(5)-Co(2)-O(7)#2                                                                                                             | 112.9(4) | O(1)-Co(2)-O(4)#3   | 111.3(4)  |
| O(5)-Co(2)-O(4)#3                                                                                                             | 109.3(4) | O(7)#2-Co(2)-O(4)#3 | 112.9(4)  |
| Symmetry transformations used to generate equivalent atoms: #1: x, y+1, z; #2: x, y-1, z; #3: x, -y, z+1/2; #4: x, -y, z-1/2. |          |                     |           |

**Table S3** The selected bond lengths [Å] and angles [°] of compound **LCU-106**.

|                                                                                                                                    |            |                     |            |
|------------------------------------------------------------------------------------------------------------------------------------|------------|---------------------|------------|
| Co(1)-O(7)#1                                                                                                                       | 1.971(4)   | Co(1)-O(7)#2        | 1.971(4)   |
| Co(1)-O(1)                                                                                                                         | 1.978(4)   | Co(1)-O(1)#3        | 1.978(4)   |
| O(7)-Co(1)#1                                                                                                                       | 1.971(4)   |                     |            |
| O(7)#1-Co(1)-O(7)#2                                                                                                                | 95.4(2)    | O(7)#1-Co(1)-O(1)   | 107.44(15) |
| O(7)#2-Co(1)-O(1)                                                                                                                  | 112.27(16) | O(7)#1-Co(1)-O(1)#3 | 112.27(16) |
| O(7)#2-Co(1)-O(1)#3                                                                                                                | 107.44(15) | O(1)-Co(1)-O(1)#3   | 119.4(2)   |
| Symmetry transformations used to generate equivalent atoms: #1: -x+3/2, -y+1/2, -z; #2: x-1/2, -y+1/2, z-1/2; #3: -x+1, y, -z-1/2. |            |                     |            |
